# Supplementary material
Source: Elsevier journal article supplement (https://www.sciencedirect.com/science/article/pii/S0300893223004827)
Supplement: mmc1 [file mmc1.pdf]

**SUPPLEMENTARY DATA**

**Table 1 of the supplementary data**

Change in New York Heart Association (NYHA) functional class I-II vs III-IV from baseline to 30-day follow -up

|                                                   |                     |
|---------------------------------------------------|---------------------|
| Group 1 – Improvement NYHA III-IV → NYHA I-II     | 1798 patients (52%) |
| Group 2 – No change of NYHA class I-II → I-II     | 1456 patients (42%) |
| Group 3 – No change of NYHA class III-IV → III-IV | 160 patients (5%)   |
| Group 4 – Worsening of NYHA class I-II → III-IV   | 48 patients (1%)    |

**Table 2 of the supplementary data**

Results of the univariate logistic regression analysis. Variables with an association ( $P < .10$ ) were included in the multivariate logistic regression analysis

| Covariate                                     | OR (95%CI)       | P     |
|-----------------------------------------------|------------------|-------|
| <i>Age, y</i>                                 | 1.00 (0.98-1.0)  | .62   |
| <i>Female sex</i>                             | 0.86 (0.65-1.14) | .31   |
| <i>NYHA III-IV, baseline</i>                  | 2.70 (1.94-3.75) | < .01 |
| <i>Coronary artery disease</i>                | 1.21 (0.91-1.60) | .20   |
| <i>Atrial fibrillation</i>                    | 1.49 (1.12-1.99) | < .01 |
| <i>Previous pacemaker</i>                     | 1.46 (0.98-2.16) | < .01 |
| <i>eGFR &lt; 60 mL/min/1.73 m<sup>2</sup></i> | 1.08 (0.82-1.44) | .58   |
| <i>NT pro-BNP</i>                             | 1.00 (0.99-1.00) | .17   |
| <i>COPD</i>                                   | 1.80 (1.35-2.41) | < .01 |
| <i>Previous stroke</i>                        | 1.35 (0.87-2.01) | .18   |
| <i>Baseline reduced LVEF</i>                  | 1.69 (1.19-2.38) | < .01 |

|                                                 |                  |       |
|-------------------------------------------------|------------------|-------|
| <i>Baseline aortic valve area</i>               | 1.00 (0.89-1.12) | .96   |
| <i>Baseline peak aortic gradient</i>            | 0.98 (0.98-0.99) | < .01 |
| <i>Baseline mean aortic gradient</i>            | 0.98 (0.97-0.99) | < .01 |
| <i>Self-expandable valve</i>                    | 0.90 (0.67-1.22) | .50   |
| <i>Transfemoral approach</i>                    | 0.44 (0.30-0.63) | < .01 |
| <i>TAVR in SAVR procedure</i>                   | 0.57 (0.28-1.17) | .13   |
| <i>Major vascular complication</i>              | 0.82 (0.39-1.68) | .58   |
| <i>Major bleeding</i>                           | 0.78 (0.31-1.93) | .59   |
| <i>New-onset atrial fibrillation</i>            | 1.21 (0.71-2.10) | .48   |
| <i>New-onset left bundle branch block</i>       | 1.23 (0.77-1.97) | .39   |
| <i>Post-TAVR pacemaker</i>                      | 1.20 (0.84-1.69) | .31   |
| <i>Post-TAVR reduced LVEF</i>                   | 1.68 (1.16-2.45) | < .01 |
| <i>Severe PPM (VARC-3)</i>                      | 1.39 (0.41-4.63) | .60   |
| <i>Post-TAVR peak aortic gradient</i>           | 0.98 (0.96-1.00) | .04   |
| <i>Post-TAVR mean gradient</i>                  | 1.00 (0.96-1.03) | .80   |
| <i>Post-TAVR severe mitral regurgitation</i>    | 3.03 (2.07-4.43) | < .01 |
| <i>Post-TAVR &gt; mild aortic regurgitation</i> | 1.40 (0.81-2.42) | .23   |
| <i>Pulmonary hypertension</i>                   |                  |       |
| Moderate (PASP 31-55 mmHg)                      | 1.67 (1.05-2.65) | .03   |
| Severe (PASP > 55 mmHg)                         | 2.91 (1.55-5.46) | < .01 |

COPD, chronic pulmonary obstructive disease; eGFR, estimated glomerular filtration rate; LVEF, left ventricular ejection fraction; OR, odds ratio; PASP, pulmonary artery systolic pressure; PPM, prosthesis-patient mismatch; SAVR, surgical aortic valve replacement; TAVR, transcatheter aortic valve replacement.

**Table 3 of the supplementary data**

Results of the univariate and multivariate logistic regression analyses excluding patients with COPD.

Variables with an association ( $P < .10$ ) were included in the multivariate logistic regression analysis.

| Covariate                                     | Univariate regression |       | Multivariate regression |       |
|-----------------------------------------------|-----------------------|-------|-------------------------|-------|
|                                               | OR (95%CI)            | P     | OR (95%CI)              | P     |
| <i>Age, y</i>                                 | 1.01 (0.98-1.04)      | .47   |                         |       |
| <i>Female sex</i>                             | 0.97 (0.68-1.39)      | .88   |                         |       |
| <i>NYHA III-IV, baseline</i>                  | 2.58 (1.72-3.86)      | < .01 | 1.55 (0.84-2.85)        | .16   |
| <i>Coronary artery disease</i>                | 1.27 (0.89-1.81)      | .19   |                         |       |
| <i>Atrial fibrillation</i>                    | 1.71 (1.19-2.45)      | < .01 | 1.68 (0.96-2.91)        | .07   |
| <i>Previous pacemaker</i>                     | 1.27 (0.76-2.12)      | .36   |                         |       |
| <i>eGFR &lt; 60 mL/min/1.73 m<sup>2</sup></i> | 1.25 (0.87-1.80)      | .22   |                         |       |
| <i>NT pro-BNP</i>                             | 1.00 (0.99-1.00)      | .60   |                         |       |
| <i>Previous stroke</i>                        | 1.01 (0.55-1.87)      | .96   |                         |       |
| <i>Baseline reduced LVEF</i>                  | 1.94 (1.27-2.96)      | < .01 | 1.02 (0.36-2.89)        | .96   |
| <i>Baseline aortic valve area</i>             | 1.00 (0.91-1.11)      | .95   |                         |       |
| <i>Baseline peak aortic gradient</i>          | 0.98 (0.97-0.99)      | < .01 | 0.99 (0.96-1.01)        | .29   |
| <i>Baseline mean aortic gradient</i>          | 0.98 (0.96-0.99)      | < .01 | 0.99 (0.96-1.03)        | .67   |
| <i>Self-expandable valve</i>                  | 1.06 (0.74-1.54)      | .74   |                         |       |
| <i>Transfemoral approach</i>                  | 0.46 (0.28-0.74)      | .01   | 0.80 (0.37-1.74)        | .57   |
| <i>TAVR in SAVR procedure</i>                 | 0.56 (0.22-1.38)      | .21   |                         |       |
| <i>Major vascular complication</i>            | 1.01 (0.44-2.34)      | .98   |                         |       |
| <i>Major bleeding</i>                         | 0.76 (0.24-2.44)      | .64   |                         |       |
| <i>New-onset atrial fibrillation</i>          | 1.72 (0.92-3.19)      | .09   | 3.08 (1.38-6.87)        | < .01 |

|                                           |                  |       |                  |       |
|-------------------------------------------|------------------|-------|------------------|-------|
| <i>New-onset left bundle branch block</i> | 1.14 (0.61-2.14) | .68   |                  |       |
| <i>Post-TAVR pacemaker</i>                | 1.16 (0.74-1.80) | .52   |                  |       |
| <i>Post-TAVR reduced LVEF</i>             | 1.94 (1.23-3.08) | < .01 | 1.46 (0.51-4.21) | .48   |
| <i>Severe PPM (VARC-3)</i>                | 1.72 (0.39-7.59) | .47   |                  |       |
| <i>Post-TAVR peak aortic gradient</i>     | 0.98 (0.95-0.99) | .04   | 0.98 (0.95-1.02) | .35   |
| <i>Post-TAVR mean gradient</i>            | 0.99 (0.95-1.02) | .56   |                  |       |
| <i>Post-TAVR severe MR</i>                | 3.08 (1.94-4.88) | < .01 | 2.24 (1.22-4.10) | < .01 |
| <i>Post-TAVR &gt; mild AR</i>             | 1.93 (1.05-3.52) | .03   | 1.22 (0.54-2.76) | .64   |
| <i>Pulmonary hypertension</i>             |                  |       |                  |       |
| Moderate (PASP 31-55 mmHg)                | 1.72 (0.96-3.01) | .07   | 1.36 (0.67-2.75) | .39   |
| Severe (PASP > 55 mmHg)                   | 3.22 (1.46-7.12) | < .01 | 1.41 (0.48-4.11) | .53   |

COPD, chronic pulmonary obstructive disease; eGFR, estimated glomerular filtration rate; LVEF, left ventricular ejection fraction; PASP, pulmonary artery systolic pressure; PPM, prosthesis-patient mismatch; SAVR, surgical aortic valve replacement; TAVR, transcatheter aortic valve replacement.
